CORRECTION

# Correction: Seven-year longitudinal change in risk factors for non-communicable diseases in rural Kerala, India: The WHO STEPS approach

The *PLOS ONE* staff

[Table 3](#) appears incorrectly. Please see the complete, correct [Table 3](#) here. The publisher apologizes for the error.

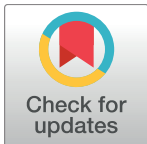

## OPEN ACCESS

**Citation:** The *PLOS ONE* staff (2017) Correction: Seven-year longitudinal change in risk factors for non-communicable diseases in rural Kerala, India: The WHO STEPS approach. *PLoS ONE* 12(8): e0183379. <https://doi.org/10.1371/journal.pone.0183379>

**Published:** August 10, 2017

**Copyright:** © 2017 The PLOS ONE staff. This is an open access article distributed under the terms of the [Creative Commons Attribution License](#), which permits unrestricted use, distribution, and reproduction in any medium, provided the original author and source are credited.

**Table 3. Age-adjusted change in the prevalence of risk factors for non-communicable diseases in the study cohort.**

|                                            |       | N      | Baseline (2003) | N      | Follow-up (2010) | Age-adjusted odds ratio <sup>a</sup> (95% CI) | p value |
|--------------------------------------------|-------|--------|-----------------|--------|------------------|-----------------------------------------------|---------|
| Current smoking <sup>b</sup>               | Men   | 189221 | 65 (34.4)       | 189221 | 63 (33.3)        | 0.8 (0.6 to 1.1)                              | 0.148   |
|                                            | Women |        | 0               |        | 0                | —                                             | —       |
| Current smokeless tobacco use <sup>c</sup> | Men   | 189221 | 35 (18.5)       | 189221 | 52 (27.5)        | 1.6 (1.1 to 2.2)                              | 0.012   |
|                                            | Women |        | 12 (5.4)        |        | 20 (9.1)         | 1.2 (0.7 to 2.3)                              | 0.546   |
| Alcohol use <sup>d</sup>                   | Men   | 189221 | 88 (46.6)       | 189221 | 128 (67.7)       | 2.6 (1.9 to 3.5)                              | <0.001  |
|                                            | Women |        | 5 (2.3)         |        | 23 (10.4)        | 4.8 (1.8 to 12.6)                             | 0.001   |
| No daily intake of fruits and vegetables   |       | 410    | 369 (90.0)      | 410    | 355 (86.6)       | 0.7 (0.5 to 1.1)                              | 0.127   |
| Physical inactivity <sup>e</sup>           |       | 410    | 337 (82.2)      | 410    | 372 (90.7)       | 2.0 (1.3 to 3.0)                              | 0.002   |
| Overweight <sup>f</sup>                    |       | 410    | 73 (17.8)       | 410    | 67 (16.3)        | 0.9 (0.6 to 1.2)                              | 0.440   |
| Obesity <sup>g</sup>                       |       | 410    | 97 (23.7)       | 410    | 172 (42.0)       | 2.2 (1.7 to 2.8)                              | <0.001  |
| Central obesity <sup>h</sup>               |       | 410    | 204 (49.8)      | 410    | 276 (67.3)       | 1.9 (1.5 to 2.3)                              | <0.001  |
| Hypertension <sup>i</sup>                  |       | 410    | 150 (36.6)      | 410    | 177 (43.2)       | 0.9 (0.7 to 1.2)                              | 0.572   |

CI; confidence interval.

Data are n (%) or odds ratio (95% CI).

<sup>a</sup> Estimated using the generalized estimating equation by including age as a covariate in a binomial logistic regression model with an exchangeable working correlation matrix and robust standard errors.

<sup>b</sup> Smoked any tobacco products in the last 30 days [2].

<sup>c</sup> Used any smokeless tobacco products in the last 30 days [2].

<sup>d</sup> Drank at least one standard drink of alcohol (30 ml of spirits, 285 ml of beer or 120 ml of wine) in the last 12 months [2].

<sup>e</sup> No history of moderate or vigorous physical activity at work and leisure, and do not walk or bicycle for travel [2].

<sup>f</sup> Body mass index  $\geq 23$  kg/m<sup>2</sup> but  $< 25$  kg/m<sup>2</sup> according to the World Health Organization (WHO) Asia Pacific guidelines [14].

<sup>g</sup> Body mass index  $\geq 25$  kg/m<sup>2</sup> according to the WHO Asia Pacific guidelines [14].

<sup>h</sup> Waist circumference  $\geq 90$  cm for men and  $\geq 80$  cm for women according to the WHO Asia Pacific guidelines [14].

<sup>i</sup> Systolic blood pressure  $\geq 140$  mmHg and/or diastolic blood pressure  $\geq 90$  mmHg and/or current use of anti-hypertensive medications according to the Joint National committee 7 criteria [15].

<https://doi.org/10.1371/journal.pone.0183379.t001>

## Reference

1. Sathish T, Kannan S, Sarma SP, Razum O, Sauzet O, Thankappan KR (2017) Seven-year longitudinal change in risk factors for non-communicable diseases in rural Kerala, India: The WHO STEPS approach. PLoS ONE 12(6): e0178949. <https://doi.org/10.1371/journal.pone.0178949> PMID: 28598973
